# Supplementary material for: On the Willingness to Report and the Consequences of Reporting Research Misconduct: The Role of Power Relations
Source: PubMed Central journal article supplement (PMC7286863; doi:10.1007/s11948-020-00202-8), 2020-02-26
Supplement: 11948_2020_202_MOESM1_ESM.pdf [file 11948_2020_202_MOESM1_ESM.pdf]

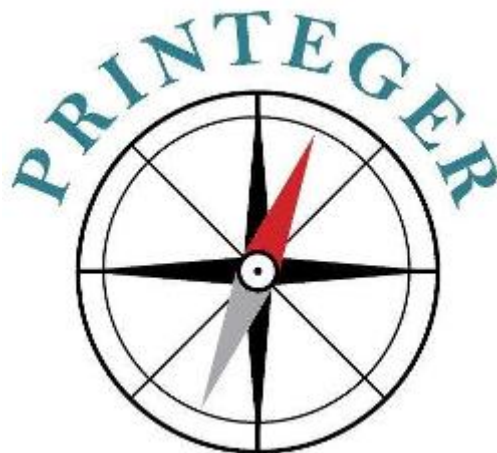

# Printeger survey

In this survey, we will gather data on organisational policies on misconduct and integrity; whistleblowing mechanisms and attitudes; work environment features; perceptions of tensions and risks associated with misconduct and compromise of scientific quality; perceptions of integrity measures; and prevalence of misconduct. We will also ask some background questions.

The information gathered in this survey will be secured so that it is accessible only to the PRINTEGER research team in Oslo. Even if it might in some cases be theoretically possible to identify individuals by connecting background variables, this will not be done in the analysis, nor in the reporting of the data. We will not present comparative data naming the organisations included in the survey. Data will be securely stored at a password-encrypted PC for five years after the project is completed: then the data will be deleted.

In filling out the survey you should not reveal any information about individual persons. If you would like to report cases of misconduct, we encourage you to use the channels that are available in your organisation/country.

The survey has been approved by the relevant research ethics or data protection authorities in the PRINTEGER partner countries.

No data will be saved until the form is submitted. Because your answers will not be traced to your name and your name is not registered with any electronic identity, it will not be possible for us to remove your individual answers once they have been submitted in the web form.

If you have questions about the survey or about the project, please do not hesitate to contact the PRINTEGER partner in your country <http://printeger.eu/consortium/>, the partner responsible for the survey ([Eric.Breit@afi.hioa.no](mailto:Eric.Breit@afi.hioa.no)) or the project coordinator ([H.Zwart@science.ru.nl](mailto:H.Zwart@science.ru.nl)).

The following information about hidden identity is standard information from the survey provider Questback Essentials:

**1) Consent to participate**

- I consent to participate in the survey     I do not consent to participate in the survey.

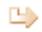**ORGANISATIONAL POLICIES**

In this section we are interested in your research institution's policies for raising awareness of research misconduct and integrity.

**2) Does your research institution have a written policy about research misconduct and integrity at the following levels?**

|               | Yes                   | No                    | I don't know          |
|---------------|-----------------------|-----------------------|-----------------------|
| My department | <input type="radio"/> | <input type="radio"/> | <input type="radio"/> |
| My faculty    | <input type="radio"/> | <input type="radio"/> | <input type="radio"/> |
| My university | <input type="radio"/> | <input type="radio"/> | <input type="radio"/> |

**3) On a scale from 1 to 10 with 1 being "very unsure" and 10 being "very sure":**

|                                                                     | 1                     | 2                     | 3                     | 4                     | 5                     | 6                     | 7                     | 8                     | 9                     | 10                    |
|---------------------------------------------------------------------|-----------------------|-----------------------|-----------------------|-----------------------|-----------------------|-----------------------|-----------------------|-----------------------|-----------------------|-----------------------|
| How confident are you in your understanding of research misconduct? | <input type="radio"/> | <input type="radio"/> | <input type="radio"/> | <input type="radio"/> | <input type="radio"/> | <input type="radio"/> | <input type="radio"/> | <input type="radio"/> | <input type="radio"/> | <input type="radio"/> |

**4) How are new employees introduced to research integrity in your department? (Several answers possible)**

- No particular introduction
- Ethics course
- Oral introduction to ethical guidelines
- Written information about ethical guidelines
- I don't know

**5) How consistently do managers in your department communicate high expectations for research integrity?**

- Not at all
- Somewhat
- Moderately
- Very
- Completely
- No basis for Judging

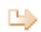

Here we are interested in the mechanisms for and attitudes towards whistleblowing when it comes to research misconduct.

**6) To what degree would you feel responsible to report internally or externally the suspected misconduct if you witnessed any of the following**

|                                                                                                                                 | Not at all            | To a small degree     | To a certain degree   | To a large degree     |
|---------------------------------------------------------------------------------------------------------------------------------|-----------------------|-----------------------|-----------------------|-----------------------|
| Fabrication of data                                                                                                             | <input type="radio"/> | <input type="radio"/> | <input type="radio"/> | <input type="radio"/> |
| Plagiarism                                                                                                                      | <input type="radio"/> | <input type="radio"/> | <input type="radio"/> | <input type="radio"/> |
| Falsification of data (i.e. manipulating research materials without scientific justification)                                   | <input type="radio"/> | <input type="radio"/> | <input type="radio"/> | <input type="radio"/> |
| Selective dropping of data from "outlier" cases without transparent explanation                                                 | <input type="radio"/> | <input type="radio"/> | <input type="radio"/> | <input type="radio"/> |
| Trying out a variety of different methods of analysis until one is found that yields a result that is statistically significant | <input type="radio"/> | <input type="radio"/> | <input type="radio"/> | <input type="radio"/> |
| Withholding data from the research community                                                                                    | <input type="radio"/> | <input type="radio"/> | <input type="radio"/> | <input type="radio"/> |
| Falsification of bio-sketch, resume or personal reference statements                                                            | <input type="radio"/> | <input type="radio"/> | <input type="radio"/> | <input type="radio"/> |
| Non-disclosure of a conflict of interest                                                                                        | <input type="radio"/> | <input type="radio"/> | <input type="radio"/> | <input type="radio"/> |
| Pressure from a study sponsor or contractor to engage in unethical research conduct or skewed presentation of research          | <input type="radio"/> | <input type="radio"/> | <input type="radio"/> | <input type="radio"/> |

### 7) Do you agree with the following statements about whistleblowing?

|                                                                                                                                            | Not at all            | To a small degree     | To a certain degree   | To a large degree     |
|--------------------------------------------------------------------------------------------------------------------------------------------|-----------------------|-----------------------|-----------------------|-----------------------|
| I know the appropriate routines for whistleblowing in the event of witnessing misconduct                                                   | <input type="radio"/> | <input type="radio"/> | <input type="radio"/> | <input type="radio"/> |
| I feel confident that I would be protected as a whistleblower                                                                              | <input type="radio"/> | <input type="radio"/> | <input type="radio"/> | <input type="radio"/> |
| I feel confident that the faculty (or other relevant bodies in the university) would take seriously the whistleblowing and act accordingly | <input type="radio"/> | <input type="radio"/> | <input type="radio"/> | <input type="radio"/> |

### 8) If you witnessed or heard about suspected misconduct, with whom would you discuss this? (Several answers possible)

- Persons involved in the misconduct
- Department colleagues generally
- Research managers
- Department manager
- Research ethics committee staff
- Ombudsman
- Union representative
- Media
- Nobody
- Other, please specify

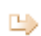

### WORK ENVIRONMENT

In this section we are interested in how you perceive aspects of your work environment that may be relevant to research misconduct and integrity.

**9) In your immediate work environment, how would you rate the following?**

|                                                                                   | Very low              | Low                   | Medium/average        | High                  | Very high             | I don't know          |
|-----------------------------------------------------------------------------------|-----------------------|-----------------------|-----------------------|-----------------------|-----------------------|-----------------------|
| Availability of academic positions                                                | <input type="radio"/> | <input type="radio"/> | <input type="radio"/> | <input type="radio"/> | <input type="radio"/> | <input type="radio"/> |
| Difficulty in obtaining tenure                                                    | <input type="radio"/> | <input type="radio"/> | <input type="radio"/> | <input type="radio"/> | <input type="radio"/> | <input type="radio"/> |
| Pressure on researchers to obtain external funding                                | <input type="radio"/> | <input type="radio"/> | <input type="radio"/> | <input type="radio"/> | <input type="radio"/> | <input type="radio"/> |
| Pressure on researchers to publish                                                | <input type="radio"/> | <input type="radio"/> | <input type="radio"/> | <input type="radio"/> | <input type="radio"/> | <input type="radio"/> |
| Severity of penalties for research misconduct                                     | <input type="radio"/> | <input type="radio"/> | <input type="radio"/> | <input type="radio"/> | <input type="radio"/> | <input type="radio"/> |
| Chances of getting caught for research misconduct if it occurs                    | <input type="radio"/> | <input type="radio"/> | <input type="radio"/> | <input type="radio"/> | <input type="radio"/> | <input type="radio"/> |
| Researchers' understanding of rules and procedures related to research misconduct | <input type="radio"/> | <input type="radio"/> | <input type="radio"/> | <input type="radio"/> | <input type="radio"/> | <input type="radio"/> |
| Management understanding of rules and procedures related to research misconduct   | <input type="radio"/> | <input type="radio"/> | <input type="radio"/> | <input type="radio"/> | <input type="radio"/> | <input type="radio"/> |
| My own understanding of rules and procedures related to research misconduct       | <input type="radio"/> | <input type="radio"/> | <input type="radio"/> | <input type="radio"/> | <input type="radio"/> | <input type="radio"/> |
| Researchers' support of rules and procedures related to research misconduct       | <input type="radio"/> | <input type="radio"/> | <input type="radio"/> | <input type="radio"/> | <input type="radio"/> | <input type="radio"/> |
| Management support of rules and procedures related to research misconduct         | <input type="radio"/> | <input type="radio"/> | <input type="radio"/> | <input type="radio"/> | <input type="radio"/> | <input type="radio"/> |
| My own support of rules and procedures related to research misconduct             | <input type="radio"/> | <input type="radio"/> | <input type="radio"/> | <input type="radio"/> | <input type="radio"/> | <input type="radio"/> |

**10) In your department are there direct economic incentives (other than career advancement) for you individually related to**

|                                    | No                    | Yes                   | I don't know          | I do not wish to answer |
|------------------------------------|-----------------------|-----------------------|-----------------------|-------------------------|
| Acquisition of research funding    | <input type="radio"/> | <input type="radio"/> | <input type="radio"/> | <input type="radio"/>   |
| Publication of scientific articles | <input type="radio"/> | <input type="radio"/> | <input type="radio"/> | <input type="radio"/>   |
| Other                              | <input type="radio"/> | <input type="radio"/> | <input type="radio"/> | <input type="radio"/>   |

**11) To what degree do you agree/disagree with the following statements about the work environment in your department?**

|                                                                                                                         | Strongly disagree     | Disagree              | Neither disagree nor agree | Agree                 | Strongly agree        |
|-------------------------------------------------------------------------------------------------------------------------|-----------------------|-----------------------|----------------------------|-----------------------|-----------------------|
| The work culture at my department is oriented more towards individual performances than towards collective performances | <input type="radio"/> | <input type="radio"/> | <input type="radio"/>      | <input type="radio"/> | <input type="radio"/> |
| I conduct most of my research alone rather than in collaboration with colleagues                                        | <input type="radio"/> | <input type="radio"/> | <input type="radio"/>      | <input type="radio"/> | <input type="radio"/> |
| It is easy for my colleagues and managers to monitor and assess my research                                             | <input type="radio"/> | <input type="radio"/> | <input type="radio"/>      | <input type="radio"/> | <input type="radio"/> |
| In my department there is a strong hierarchy between senior and junior researchers                                      | <input type="radio"/> | <input type="radio"/> | <input type="radio"/>      | <input type="radio"/> | <input type="radio"/> |
| The culture of my department is supportive of openly resolving ethical concerns or research errors                      | <input type="radio"/> | <input type="radio"/> | <input type="radio"/>      | <input type="radio"/> | <input type="radio"/> |
| There is a shared understanding of what is good research conduct in my department                                       | <input type="radio"/> | <input type="radio"/> | <input type="radio"/>      | <input type="radio"/> | <input type="radio"/> |
| My department managers' focus on research integrity is strong                                                           | <input type="radio"/> | <input type="radio"/> | <input type="radio"/>      | <input type="radio"/> | <input type="radio"/> |
| I frequently assess my own performance (for instance my H index, Research Gate score etc.) compared to that of my peers | <input type="radio"/> | <input type="radio"/> | <input type="radio"/>      | <input type="radio"/> | <input type="radio"/> |
| I have an active role in academic networks, associations or societies outside my own department                         | <input type="radio"/> | <input type="radio"/> | <input type="radio"/>      | <input type="radio"/> | <input type="radio"/> |
| In my department there is a culture for open discussion about research misconduct and integrity                         | <input type="radio"/> | <input type="radio"/> | <input type="radio"/>      | <input type="radio"/> | <input type="radio"/> |
| In my department there is a high level of pressure to commercialize results or outcomes of research                     | <input type="radio"/> | <input type="radio"/> | <input type="radio"/>      | <input type="radio"/> | <input type="radio"/> |
| In my department there is a high level of time and workload pressure regarding research activities                      | <input type="radio"/> | <input type="radio"/> | <input type="radio"/>      | <input type="radio"/> | <input type="radio"/> |

**12) In your department, how guarded are people in their communications with each other out of concern that someone else will "steal" their ideas?**

- Not guarded at all
- Somewhat guarded
- Guarded
- Very Guarded

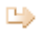

## TENSIONS AND RISK

Here we are interested in what you perceive as risks related to research misconduct.

**13) If you work in projects or take part in academic networks with scientists from other institutions, countries or fields, do you experience conflicting standards regarding proper research conduct?**

- Never
  Seldom
  Sometimes
  Often

**14) Do you experience a tension between loyalty to academic values of rigorous research and loyalty to**

|                           | Never                 | Seldom                | Sometimes             | Often                 |
|---------------------------|-----------------------|-----------------------|-----------------------|-----------------------|
| Funding bodies            | <input type="radio"/> | <input type="radio"/> | <input type="radio"/> | <input type="radio"/> |
| The department management | <input type="radio"/> | <input type="radio"/> | <input type="radio"/> | <input type="radio"/> |
| Co-workers                | <input type="radio"/> | <input type="radio"/> | <input type="radio"/> | <input type="radio"/> |
| The subjects of research  | <input type="radio"/> | <input type="radio"/> | <input type="radio"/> | <input type="radio"/> |

**15) In my faculty, I perceive research misconduct to be a minor problem**

- Strongly disagree  
 Slightly disagree  
 Neither agree nor disagree  
 Agree slightly  
 Agree strongly

**16) In my field of research, I perceive research misconduct to be a minor problem**

- Strongly disagree  
 Slightly disagree  
 Neither agree nor disagree  
 Agree slightly  
 Agree strongly

**17) In research in general, I perceive research misconduct to be a minor problem**

- Strongly disagree
- Slightly disagree
- Neither agree nor disagree
- Agree slightly
- Agree strongly

**18) How do you rate the risk that you might be personally implicated in research misconduct or questionable research practices?**

- Impossible
- Very unlikely
- Unlikely
- Neither likely, nor unlikely
- Likely
- Very likely

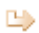**RESEARCH QUALITY**

Compromised research quality may in some situations be a question of research integrity and we are therefore also interested in factors that may affect quality.

**19) Have any of the funders of research projects you have been involved in ever unduly interfered in your work?**

- No
- Yes
- Do not wish to answer

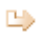**20) You answered "yes" to the prior question that any of the funders of research projects you have been involved had ever unduly interfered in your work. Can you please shortly elaborate?**



**21) Do you believe that the quality of your research varies depending on the funding source?**

- No
- Yes
- I don't know
- I do not wish to answer

**22) Does the quality of your research**

|                                            | Yes                   | No                    | Not sure              |
|--------------------------------------------|-----------------------|-----------------------|-----------------------|
| Suffer due to strict time constraints?     | <input type="radio"/> | <input type="radio"/> | <input type="radio"/> |
| Suffer due to insufficient available data? | <input type="radio"/> | <input type="radio"/> | <input type="radio"/> |
| Suffer due to other reasons                | <input type="radio"/> | <input type="radio"/> | <input type="radio"/> |

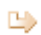**23) You answered "Yes" on the prior question "Does the quality of your research suffer due to other reasons". Could you please specify?**

**24) Do you believe that you have a better chance of getting your research published if you draw stricter conclusions and avoid mentioning uncertainties in the abstract/conclusion of your study (but rather in a limitations section)?**

- Yes
- No
- I don't know

**25) Do you attempt to publish findings also when they are negative or inconclusive in respect to a specific research question?**

- Always     Sometimes     Rarely     Never     Not relevant

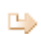**INTEGRITY MEASURES**

Here we are interested in how you perceive potential integrity measures.

**26) In order to strengthen research integrity and/or reduce the risk of misconduct, to what degree do you agree that the following measures are useful**

|                                                                                  | Strongly disagree     | Disagree              | Neither disagree nor agree | Agree                 | Strongly agree        |
|----------------------------------------------------------------------------------|-----------------------|-----------------------|----------------------------|-----------------------|-----------------------|
| Increased monitoring internally (by managers)                                    | <input type="radio"/> | <input type="radio"/> | <input type="radio"/>      | <input type="radio"/> | <input type="radio"/> |
| Increased monitoring internally (by peers)                                       | <input type="radio"/> | <input type="radio"/> | <input type="radio"/>      | <input type="radio"/> | <input type="radio"/> |
| Increased monitoring externally (for instance by research funding organisations) | <input type="radio"/> | <input type="radio"/> | <input type="radio"/>      | <input type="radio"/> | <input type="radio"/> |
| Change of performance criteria and rewards                                       | <input type="radio"/> | <input type="radio"/> | <input type="radio"/>      | <input type="radio"/> | <input type="radio"/> |
| Ethical reflection groups and open dialogue                                      | <input type="radio"/> | <input type="radio"/> | <input type="radio"/>      | <input type="radio"/> | <input type="radio"/> |
| Managerial emphasis and attention to research integrity                          | <input type="radio"/> | <input type="radio"/> | <input type="radio"/>      | <input type="radio"/> | <input type="radio"/> |
| Increased severity of sanctions                                                  | <input type="radio"/> | <input type="radio"/> | <input type="radio"/>      | <input type="radio"/> | <input type="radio"/> |
| Information on ethical guidelines                                                | <input type="radio"/> | <input type="radio"/> | <input type="radio"/>      | <input type="radio"/> | <input type="radio"/> |
| Online training tools                                                            | <input type="radio"/> | <input type="radio"/> | <input type="radio"/>      | <input type="radio"/> | <input type="radio"/> |
| Conventional training and education in research ethics                           | <input type="radio"/> | <input type="radio"/> | <input type="radio"/>      | <input type="radio"/> | <input type="radio"/> |

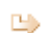

**PREVALENCE OF RESEARCH MISCONDUCT**

Here we are interested in your personal experience with research misconduct.

**27) Have you known about or justifiably suspected that any of the colleagues in your faculty during the last 12 months has**

|                                                                                                                                | Yes                   | No                    | Uncertain/do<br>not know | Do not<br>want<br>to<br>answer | Not<br>applicable     |
|--------------------------------------------------------------------------------------------------------------------------------|-----------------------|-----------------------|--------------------------|--------------------------------|-----------------------|
| Fabricated data                                                                                                                | <input type="radio"/> | <input type="radio"/> | <input type="radio"/>    | <input type="radio"/>          | <input type="radio"/> |
| Plagiarized data                                                                                                               | <input type="radio"/> | <input type="radio"/> | <input type="radio"/>    | <input type="radio"/>          | <input type="radio"/> |
| Falsified data                                                                                                                 | <input type="radio"/> | <input type="radio"/> | <input type="radio"/>    | <input type="radio"/>          | <input type="radio"/> |
| Selectively dropped data from "outlier" cases without transparent explanation                                                  | <input type="radio"/> | <input type="radio"/> | <input type="radio"/>    | <input type="radio"/>          | <input type="radio"/> |
| Tried out a variety of different methods of analysis until one is found that yields a result that is statistically significant | <input type="radio"/> | <input type="radio"/> | <input type="radio"/>    | <input type="radio"/>          | <input type="radio"/> |
| Deliberately withheld data from the research community to gain personal or institutional advantage                             | <input type="radio"/> | <input type="radio"/> | <input type="radio"/>    | <input type="radio"/>          | <input type="radio"/> |
| Falsified biosketch, resume, reference list                                                                                    | <input type="radio"/> | <input type="radio"/> | <input type="radio"/>    | <input type="radio"/>          | <input type="radio"/> |
| Not disclosed a conflict of interest                                                                                           | <input type="radio"/> | <input type="radio"/> | <input type="radio"/>    | <input type="radio"/>          | <input type="radio"/> |
| Claimed undeserved authorship                                                                                                  | <input type="radio"/> | <input type="radio"/> | <input type="radio"/>    | <input type="radio"/>          | <input type="radio"/> |
| Denied authorship to contributors                                                                                              | <input type="radio"/> | <input type="radio"/> | <input type="radio"/>    | <input type="radio"/>          | <input type="radio"/> |
| Been pressured by a study sponsor or contractor to engage in unethical research conduct or skewed presentation of research     | <input type="radio"/> | <input type="radio"/> | <input type="radio"/>    | <input type="radio"/>          | <input type="radio"/> |

**28) Have you during the last 12 months been exposed to unethical pressure concerning**

|                               | Yes                   | No                    | Uncertain/do<br>not know | Do not<br>want<br>to<br>answer | Not<br>applicable     |
|-------------------------------|-----------------------|-----------------------|--------------------------|--------------------------------|-----------------------|
| Ordering/inclusion of authors | <input type="radio"/> | <input type="radio"/> | <input type="radio"/>    | <input type="radio"/>          | <input type="radio"/> |
| Design/method                 | <input type="radio"/> | <input type="radio"/> | <input type="radio"/>    | <input type="radio"/>          | <input type="radio"/> |
| Analysis of data              | <input type="radio"/> | <input type="radio"/> | <input type="radio"/>    | <input type="radio"/>          | <input type="radio"/> |
| Presentation of results       | <input type="radio"/> | <input type="radio"/> | <input type="radio"/>    | <input type="radio"/>          | <input type="radio"/> |

**29) If you answered 'yes' to having been exposed to unethical pressure; please indicate the sources of the pressure (several answers possible):**

- The commissioner/funder of the research
- Stakeholders with interest in the research
- Colleagues in my faculty
- A manager in my faculty
- Colleagues outside my faculty
- Colleagues or managers at a former employer
- Not applicable
- Other, please specify

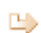

**30) If you have first-hand knowledge of specific situations of research misconduct please select one situation and answer the following questions. Please do not include any identifying information.**

- Yes, I do have a first-hand knowledge of a case
- No, I do not have first-hand knowledge of a case
- I do not wish to answer

**31) You have a first-hand knowledge of case of research misconduct. Can you please elaborate on the following questions**

How did you first learn about the instance of research misconduct?

Please describe the specific instance of research misconduct

What did you do when you became aware of it?

Whom (titles only) did you talk with about the research misconduct? How did you feel during this experience?

Were you able to talk with the individual(s) who were involved about it? Please describe your interaction.

Was the instance reported? If so, to whom and by whom? Whether the decision was to report or not, how was the decision made? What were the factors underlying the decision to make the report?

What was the outcome? How did you feel about the way it was handled?

Did you think anything changed as a result?

Is there anything you would have done differently?

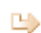**BACKGROUND QUESTIONS**

Here we would like to gain some more information about background variables that might be relevant to explain experiences and that will help us design well-targeted recommendations for effective integrity measures.

**32) How many academic (peer-reviewed) publications (including co-authored papers) have you authored over the last year?**

- 0     1-2     3-5     6-9     10 or more

**33) Do you belong to any association for researchers?**

- Yes
- No
- Not applicable
- Do not want to answer

**34) How many lectures, workshops, or conferences on research ethics have you attended (or held) in the past year?**

- 0
- 1-5
- 6-10
- 11 or more

**35) How satisfied are you with your current work situation (i.e. your well-being at work)?**

- Very satisfied
- Quite satisfied
- Neither satisfied nor dissatisfied
- Quite unsatisfied
- Not satisfied at all

**36) To what extent do you identify with the professional culture and values of your department?**

- To a large extent
- To a certain extent
- To a small extent
- Not at all
- Don't have an opinion
- Don't know

**37) Age**

- 20-29
- 30-39
- 40-49
- 50-59
- 60-69
- 70 and older

**38) Gender**

- Male
- Female
- Other

**39) Employed at**

- University of Bonn
- University of Bristol
- Free University of Brussels
- University of Leiden
- Radboud University
- University of Tartu
- University of Trento
- Oslo and Akershus University College of Applied Sciences
- Other/Do not wish to answer

**40) Highest academic degree**

- Doctoral degree
- Master's degree
- Bachelor's degree
- Other degree

**41) Academic field (of your highest degree)**

- Engineering sciences
- Language, information and communication
- Law, arts and humanities
- Medical and life sciences
- Natural sciences
- Social and behavioral sciences

**42) Do you currently have a manager or leadership role?**

- No
- Yes

**43) Current academic position**

- Professor or equivalent
- Associate/Assistant Professor/Senior researcher/Lecturer or equivalent
- Teacher
- Post-doc
- PhD student/Research or teaching assistant
- Technical and administrative research staff (Research coordinator or laboratory personnel)
- Other, please specify

**44) Appointment**

- Temporary
- Permanent



**45) Where do you get your research funding? (several answers possible)**

- Own institution
- National research councils
- Public or non-profit organizations
- Industry
- EU and other international funds
- Not applicable

**46) Years active in research**

- 0-5
- 6-10
- 11-15
- 16 or more
- Not applicable

© Copyright www.questback.com. All Rights Reserved.
